# Supplementary material
Source: PubMed Central journal article supplement (PMC2684546)
Supplement: NIHMS4271-supplement-suppmat.pdf [file NIHMS4271-supplement-suppmat.pdf]

## Supplementary Figs and legends

Figure S1

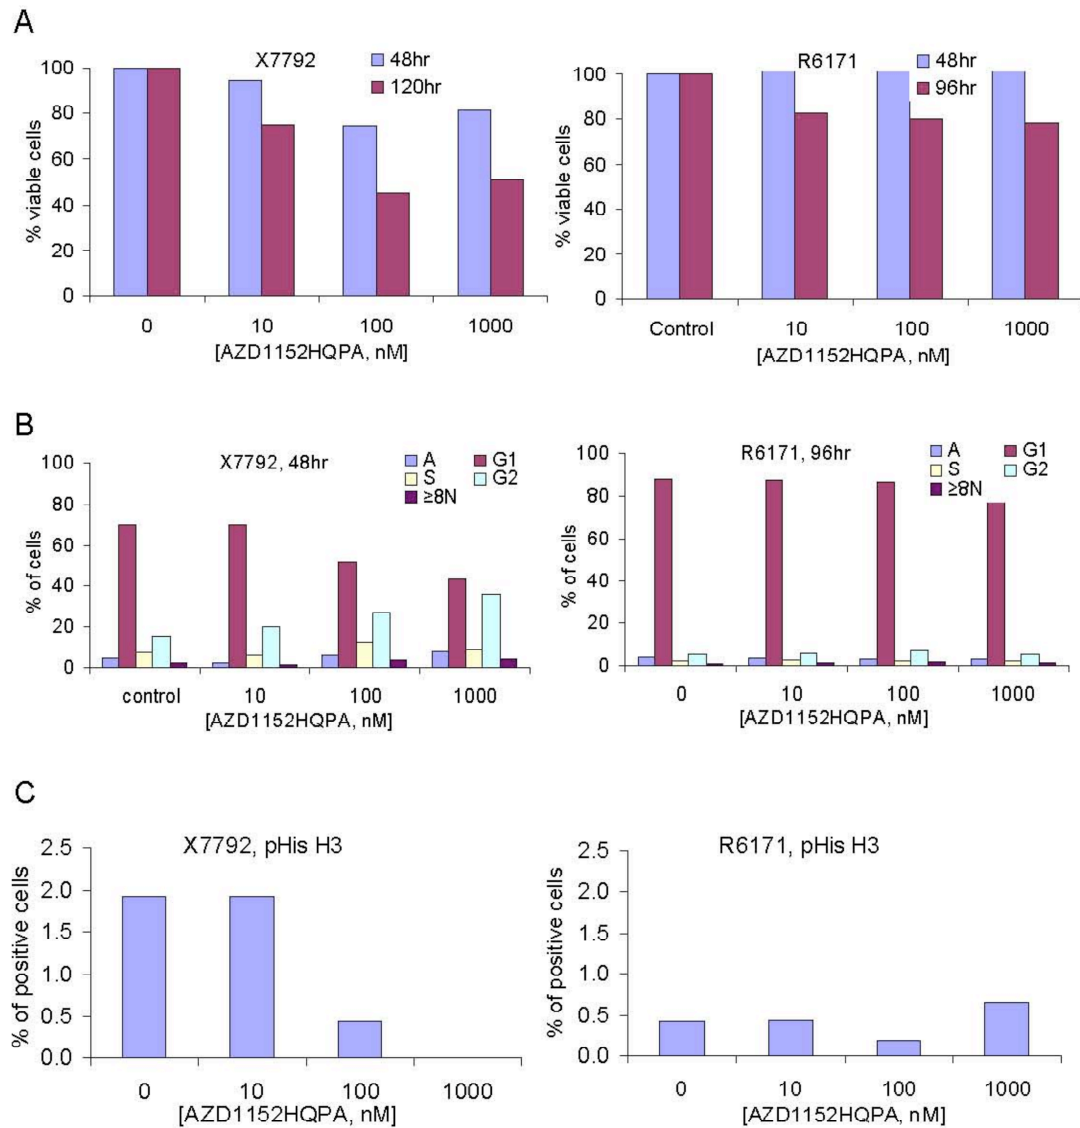

**Figure S1.** AZD1152-HQPA activity in 2 primary AML samples showing effect on viable cell number (Fig S1A), cell cycle distribution (Fig S1B, including apoptotic (sub-G1) and polyploid cells) and pHis H3 (Fig S1C).

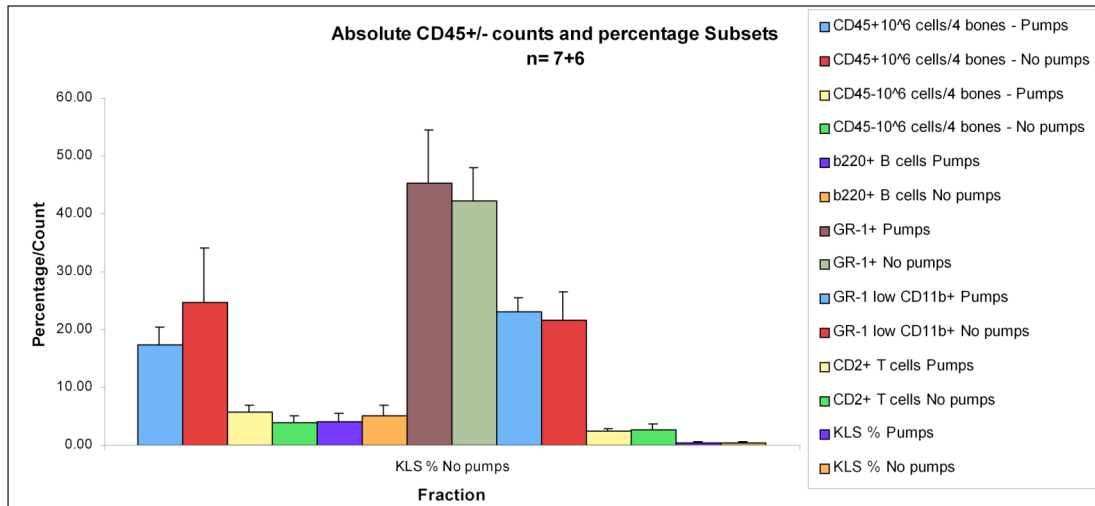

**Figure S2: Effect of 1 week of AZD1152 treatment of the frequency of NOD/SCID haematopoietic cell subsets.** CD45<sup>+</sup> cell numbers are expressed as absolute numbers obtained from the four rear murine long bones. All other subsets are expressed as a percentage of live, debris-free CD45<sup>+</sup> cells. Although there was an overall reduction in CD45<sup>+</sup> cells, there did not seem to be any particular subset that was preferentially targeted and the mice tolerated this treatment.

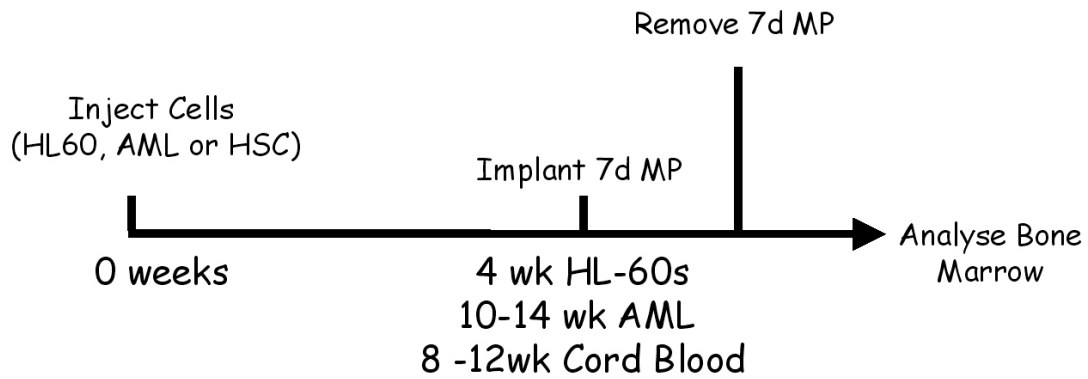

**Figure S3: Summary of *in vivo* AZD1152 treatment regimens.** A flow chart summary of the AZD1152 treatment timing during *in vivo* experiments. Cells ( $10^6$  HL-60s,  $10^7$  primary AML cells or  $5 \times 10^4$  Lin<sup>-</sup> CB cells) were injected i.v. into sub-lethally irradiated NOD/SCID mice. Mice were then left for differing periods (depending on the cell source) of time before AZD1152 treatment for the xenograft to reach appropriate levels. This was 4 weeks for HL-60s, 10 weeks for primary AML cells and 8 weeks for CB Lin<sup>-</sup> cells. At these time points, AZD1152 was administered via osmotic mini-pumps at 25mg/Kg/day for one week. At the end of this treatment week, pumps were removed and mice were either left for follow-up studies or sacrificed and analysed for human cell content.

**Table S1**

| Sample ID | FAB type            | Karyotype                     | WBC | % of Blast cells in BM |
|-----------|---------------------|-------------------------------|-----|------------------------|
| AML-1     | AML M1              | NK                            | 151 | 90                     |
| AML-2     | AML M2              | +11+13                        | 27  | 89                     |
| AML-3     | AML M4              | NK                            | 43  | 95                     |
| AML-4     | AML M5              | ND                            | 212 | 95                     |
| AML-5     | AML M1              | FK                            | 64  | 91                     |
| R 6171    | AML M5v             | XY,<br>ins(10;11)(p12;q23q21) | 162 | 92                     |
| R 6187    | AML M5v             | XY,<br>ins(10;11)(p12;q23q21) | 162 | 92                     |
| R 6290    | Biphenotypic<br>AML | NK                            | 200 | 91                     |
| R 3967    | AML M4              | NK                            | 43  | 87                     |
| R 3921    | AML M4              | Inv 16                        | 113 | 83                     |
| R 2110    | AML M4              | NK                            | 127 | 90                     |
| X 7792    | AML M4              | NK                            | 108 | 90                     |
| R 5940    | AML M1              | NK                            | 206 | 91                     |
| F 7862    | AML M1              | NK                            | 79  | 87                     |
| R 4801    | AML M3v             | XX, t(15;17)(q22;q21)         | 83  | 95                     |
| R 6298    | AML M3v             | XX, t(15;17)(q22;q21)         | 83  | 95                     |
| R 6302    | AML M3v             | XX, t(15;17)(q22;q21)         | 83  | 95                     |

**Table S1: Summary of patient details used for *in vivo* experiments.** AZD1152 treatment was tested on samples from five different AML cases. Listed are the AML sample identifiers, the AML subtype according to the French-American-British (FAB) classification, the results of the karyotype assessment performed at diagnosis and the white blood cell count (WBC). NK – normal karyotype, ND – not done, FK – failed karyotype - v: represents samples from the same patients used at different time.
